# Supplementary material for: The Greening of Anthocyanins: Eco-Friendly Techniques for Their Recovery from Agri-Food By-Products
Source: MDPI journal article supplement (doi:10.3390/antiox11112169), 2022-11-01
Supplement: s1 [file s1]

**Table S1.** Anthocyanin composition of the different plant sources considered in our survey with the substitute groups in the molecules, and analytical methods of detection used.

| Plant species                                 | Common name | By-product  | Anthocyanin                                             | R <sub>1</sub> | R <sub>2</sub> | R <sub>3</sub>     | R <sub>4</sub> | Method of detection | Reference |
|-----------------------------------------------|-------------|-------------|---------------------------------------------------------|----------------|----------------|--------------------|----------------|---------------------|-----------|
| <i>Allium cepa</i> L.                         | Red onion   | Solid waste | Cyanidin-3- <i>O</i> -(6''- <i>O</i> -malonyl)glucoside | OH             | H              | (malonyl)glucoside | OH             | LC-MS               | 17        |
|                                               |             |             | Cyanidin-3- <i>O</i> -glucoside                         | OH             | H              | Glucoside          | OH             | LC-MS               | 17        |
|                                               |             |             | Cyanidin-3- <i>O</i> -arabinoside                       | OH             | H              | Arabinoside        | OH             | HPLC-UV             | 18        |
|                                               |             |             | Cyanidin-3- <i>O</i> -galactoside                       | OH             | H              | Galactoside        | OH             | HPLC-UV             | 18        |
| <i>Amelanchier alnifolia</i> Nutt. ex M.Roem. | Saskatoon   | Pomace      | Cyanidin-3- <i>O</i> -glucoside                         | OH             | H              | Glucoside          | OH             | HPLC-UV             | 18        |
|                                               |             |             | Delphinidin-3- <i>O</i> -arabinoside                    | OH             | OH             | Arabinoside        | OH             | HPLC-UV             | 18        |
|                                               |             |             | Delphinidin-3- <i>O</i> -glucoside                      | OH             | OH             | Glucoside          | OH             | HPLC-UV             | 18        |
|                                               |             |             | Delphinidin-3- <i>O</i> -diglucoside                    | OH             | OH             | Diglucoside        | OH             | UPLC-MS             | 19        |
|                                               |             |             |                                                         |                |                |                    |                | UPLC-MS             | 19        |
| <i>Crocus sativus</i> L.                      | Saffron     | Tepals      | Delphinidin-3- <i>O</i> -glucoside                      | OH             | OH             | Glucoside          | OH             | LC-MS               | 22        |
|                                               |             |             |                                                         |                |                |                    |                | LC-MS               | 20        |
|                                               |             |             | Delphinidin-3,5- <i>O</i> -diglucoside                  | OH             | OH             | Glucoside          | Glucoside      | UPLC-MS             | 19        |

|                                |   |              |                                                                             |                  |                  |                                         |           |         |    |
|--------------------------------|---|--------------|-----------------------------------------------------------------------------|------------------|------------------|-----------------------------------------|-----------|---------|----|
| Nitraria tangutorun<br>Bobrov. | - | Seed<br>meal |                                                                             |                  |                  |                                         | LC-MS     | 22      |    |
|                                |   |              |                                                                             |                  |                  |                                         | LC-MS     | 20      |    |
|                                |   |              | Malvidin-3- <i>O</i> -diglucoside                                           | OCH <sub>3</sub> | OCH <sub>3</sub> | Diglucoside                             | OH        | UPLC-MS | 19 |
|                                |   |              | Petunidin-3- <i>O</i> -glucoside                                            | OCH <sub>3</sub> | OH               | Glucoside                               | OH        | LC-MS   | 20 |
|                                |   |              |                                                                             |                  |                  |                                         | UPLC-MS   | 19      |    |
|                                |   |              | Petunidin-3,5- <i>O</i> -diglucoside                                        | OCH <sub>3</sub> | OH               | Glucoside                               | Glucoside | LC-MS   | 22 |
|                                |   |              |                                                                             |                  |                  |                                         | LC-MS     | 20      |    |
|                                |   |              | Cyanidin-3- <i>O</i> -(6"- <i>O</i> -caffeoyl)diglucoside                   | OH               | H                | (caffeoyl)diglucoside                   | OH        | HPLC-MS | 24 |
|                                |   |              | Cyanidin-3- <i>O</i> -(6"- <i>O</i> - <i>cis-p</i> -coumaroyl)diglucoside   | OH               | H                | ( <i>cis-p</i> -coumaroyl)diglucoside   | OH        | HPLC-MS | 24 |
|                                |   |              | Cyanidin-3- <i>O</i> -(6"- <i>O</i> - <i>trans-p</i> -coumaroyl)diglucoside | OH               | H                | ( <i>trans-p</i> -coumaroyl)diglucoside | OH        | HPLC-MS | 24 |
|                                |   |              | Cyanidin-3- <i>O</i> -diglucoside                                           | OH               | H                | Diglucoside                             | OH        | HPLC-MS | 24 |
|                                |   |              | Delphinidin-3- <i>O</i> -(6"- <i>O</i> -caffeoyl)diglucoside                | OH               | OH               | (caffeoyl)diglucoside                   | OH        | HPLC-MS | 24 |
|                                |   |              | Pelargonidin-3- <i>O</i> -(6"- <i>O</i> - <i>p</i> -coumaroyl)diglucoside   | H                | H                | ( <i>p</i> -coumaroyl)diglucoside       | OH        | HPLC-MS | 24 |

|                                         |             |              |                                         |                  |                  |             |           |          |    |
|-----------------------------------------|-------------|--------------|-----------------------------------------|------------------|------------------|-------------|-----------|----------|----|
|                                         |             |              | Pelargonidin-3- <i>O</i> -diglucoside   | H                | H                | Diglucoside | OH        | HPLC-MS  | 24 |
|                                         |             |              | Cyanidin-3- <i>O</i> -glucoside         | OH               | H                | Glucoside   | OH        | HPLC-DAD | 25 |
|                                         |             |              | Delphinidin-3- <i>O</i> -glucoside      | OH               | OH               | Glucoside   | OH        | HPLC-DAD | 25 |
| <i>Phaseolus vulgaris</i> L.            | Black bean  | Hulls        | Malvidin-3- <i>O</i> -glucoside         | OCH <sub>3</sub> | OCH <sub>3</sub> | Glucoside   | OH        | HPLC-DAD | 25 |
|                                         |             |              | Malvidin-3,5- <i>O</i> -diglucoside     | OCH <sub>3</sub> | OCH <sub>3</sub> | Glucoside   | Glucoside | HPLC-DAD | 25 |
| <i>Plinia cauliflora</i> (Mart.) Kausel | Jaboticaba  | Peel         | Cyanidin-3- <i>O</i> -glucoside         | OH               | H                | Glucoside   | OH        | LC-MS    | 27 |
|                                         |             |              | Cyanidin-3,5- <i>O</i> -diglucoside     | OH               | H                | Glucoside   | Glucoside | UPLC-MS  | 28 |
|                                         |             | Male flowers | Pelargonidin-3- <i>O</i> -glucoside     | H                | H                | Glucoside   | OH        | UPLC-MS  | 28 |
|                                         |             |              | Pelargonidin-3,5- <i>O</i> -diglucoside | H                | H                | Glucoside   | Glucoside | UPLC-MS  | 28 |
| <i>Punica granatum</i> L.               | Pomegranate |              | Cyanidin-3- <i>O</i> -glucoside         | OH               | H                | Glucoside   | OH        | UPLC-MS  | 28 |
|                                         |             |              | Cyanidin-3,5- <i>O</i> -diglucoside     | OH               | H                | Glucoside   | Glucoside | UPLC-MS  | 28 |
|                                         |             | Peel         | Pelargonidin-3- <i>O</i> -glucoside     | H                | H                | Glucoside   | OH        | UPLC-MS  | 28 |
|                                         |             |              | Pelargonidin-3,5- <i>O</i> -diglucoside | H                | H                | Glucoside   | Glucoside | UPLC-MS  | 28 |

|                                      |           |        |                             |                  |                  |             |    |          |    |
|--------------------------------------|-----------|--------|-----------------------------|------------------|------------------|-------------|----|----------|----|
| <i>Vaccinium angustifolium</i> Aiton | Blueberry | Pomace | Cyanidin                    | OH               | H                | OH          | OH | HPLC-DAD | 33 |
|                                      |           |        | Delphinidin                 | OH               | OH               | OH          | OH | HPLC-DAD | 33 |
|                                      |           |        | Malvidin                    | OCH <sub>3</sub> | OCH <sub>3</sub> | OH          | OH | HPLC-DAD | 33 |
|                                      |           |        | Petunidin                   | OCH <sub>3</sub> | OH               | OH          | OH | HPLC-DAD | 33 |
| <i>Vaccinium macrocarpon</i> Aiton   | Cranberry | Pomace | Cyanidin-3-O-arabinoside    | OH               | H                | Arabinoside | OH | HPLC-MS  | 34 |
|                                      |           |        | Cyanidin-3-O-galactoside    | OH               | H                | Galactoside | OH | HPLC-MS  | 34 |
|                                      |           |        | Malvidin-3-O-galactoside    | OCH <sub>3</sub> | OCH <sub>3</sub> | Galactoside | OH | HPLC-MS  | 34 |
|                                      |           |        | Malvidin-3-O-glucoside      | OCH <sub>3</sub> | OCH <sub>3</sub> | Glucoside   | OH | HPLC-MS  | 34 |
|                                      |           |        | Peonidin-3-O-arabinoside    | OCH <sub>3</sub> | H                | Arabinoside | OH | HPLC-MS  | 34 |
|                                      |           |        | Peonidin-3-O-galactoside    | OCH <sub>3</sub> | H                | Galactoside | OH | HPLC-MS  | 34 |
|                                      |           |        | Peonidin-3-O-glucoside      | OCH <sub>3</sub> | H                | Glucoside   | OH | HPLC-MS  | 34 |
| <i>Vaccinium myrtillus</i> L.        | Bilberry  | Pomace | Cyanidin-3-O-arabinoside    | OH               | H                | Arabinoside | OH | LC-MS    | 35 |
|                                      |           |        | Delphinidin-3-O-arabinoside | OH               | OH               | Arabinoside | OH | LC-MS    | 35 |

|                      |           |        |                                      |                  |                  |             |    |          |    |
|----------------------|-----------|--------|--------------------------------------|------------------|------------------|-------------|----|----------|----|
| <i>Vaccinum</i> spp. | Blueberry | Pomace | Delphinidin-3- <i>O</i> -glucoside   | OH               | OH               | Glucoside   | OH | LC-MS    | 35 |
|                      |           |        | Malvidin-3- <i>O</i> -glucoside      | OCH <sub>3</sub> | OCH <sub>3</sub> | Glucoside   | OH | LC-MS    | 35 |
|                      |           |        | Peonidin-3- <i>O</i> -arabinoside    | OCH <sub>3</sub> | H                | Arabinoside | OH | LC-MS    | 35 |
|                      |           |        | Peonidin-3- <i>O</i> -glucoside      | OCH <sub>3</sub> | H                | Glucoside   | OH | LC-MS    | 35 |
|                      |           |        | Petunidin-3- <i>O</i> -glucoside     | OCH <sub>3</sub> | OH               | Glucoside   | OH | LC-MS    | 35 |
|                      |           |        | Cyanidin-3- <i>O</i> -glucoside      | OH               | H                | Glucoside   | OH | HPLC-DAD | 37 |
|                      | Blueberry | Pomace | Delphinidin-3- <i>O</i> -arabinoside | OH               | OH               | Arabinoside | OH | HPLC-DAD | 37 |
|                      |           |        | Delphinidin-3- <i>O</i> -galactoside | OH               | OH               | Galactoside | OH | HPLC-DAD | 37 |
|                      |           |        | Delphinidin-3- <i>O</i> -glucoside   | OH               | OH               | Glucoside   | OH | HPLC-DAD | 37 |
|                      |           |        | Malvidin-3- <i>O</i> -arabinoside    | OCH <sub>3</sub> | OCH <sub>3</sub> | Arabinoside | OH | HPLC-DAD | 37 |
|                      |           |        | Malvidin-3- <i>O</i> -galactoside    | OCH <sub>3</sub> | OCH <sub>3</sub> | Galactoside | OH | HPLC-DAD | 37 |
|                      |           |        | Malvidin-3- <i>O</i> -glucoside      | OCH <sub>3</sub> | OCH <sub>3</sub> | Glucoside   | OH | HPLC-DAD | 37 |
|                      | Blueberry | Pomace | Petunidin-3- <i>O</i> -arabinoside   | OCH <sub>3</sub> | OH               | Arabinoside | OH | HPLC-DAD | 37 |

|                          |           |      |                                                                     |                  |                  |                                 |    |          |    |
|--------------------------|-----------|------|---------------------------------------------------------------------|------------------|------------------|---------------------------------|----|----------|----|
| <i>Vitis vinifera</i> L. | Red grape | Cake | Petunidin-3- <i>O</i> -galactoside                                  | OCH <sub>3</sub> | OH               | Galactoside                     | OH | HPLC-DAD | 37 |
|                          |           |      | Petunidin-3- <i>O</i> -glucoside                                    | OCH <sub>3</sub> | OH               | Glucoside                       | OH | HPLC-DAD | 37 |
|                          |           |      | Cyanidin-3- <i>O</i> -glucoside                                     | OH               | H                | Glucoside                       | OH | HPLC-DAD | 38 |
|                          |           |      | Delphinidin-3- <i>O</i> -glucoside                                  | OH               | OH               | Glucoside                       | OH | HPLC-DAD | 38 |
|                          |           |      | Malvidin-3- <i>O</i> -(6"- <i>O</i> - <i>p</i> -coumaroyl)glucoside | OCH <sub>3</sub> | OCH <sub>3</sub> | ( <i>p</i> -coumaroyl)glucoside | OH | HPLC-DAD | 38 |
|                          |           |      | Malvidin-3- <i>O</i> -glucoside                                     | OCH <sub>3</sub> | OCH <sub>3</sub> | Glucoside                       | OH | HPLC-DAD | 38 |
|                          |           |      | Peonidin-3- <i>O</i> -glucoside                                     | OCH <sub>3</sub> | H                | Glucoside                       | OH | HPLC-DAD | 38 |
|                          |           |      | Petunidin-3- <i>O</i> -glucoside                                    | OCH <sub>3</sub> | OH               | Glucoside                       | OH | HPLC-DAD | 38 |
|                          |           | Lees | Delphinidin-3- <i>O</i> -glucoside                                  | OH               | OH               | Glucoside                       | OH | HPLC-DAD | 39 |
|                          |           |      | Malvidin-3- <i>O</i> -(6"- <i>O</i> - <i>p</i> -coumaroyl)glucoside | OCH <sub>3</sub> | OCH <sub>3</sub> | ( <i>p</i> -coumaroyl)glucoside | OH | HPLC-DAD | 39 |
|                          |           |      | Malvidin-3- <i>O</i> -glucoside                                     | OCH <sub>3</sub> | OCH <sub>3</sub> | Glucoside                       | OH | HPLC-DAD | 39 |
|                          |           |      | Peonidin-3- <i>O</i> -(6"- <i>O</i> - <i>p</i> -coumaroyl)glucoside | OCH <sub>3</sub> | H                | ( <i>p</i> -coumaroyl)glucoside | OH | HPLC-DAD | 39 |
|                          |           |      | Petunidin-3- <i>O</i> -glucoside                                    | OCH <sub>3</sub> | OH               | Glucoside                       | OH | HPLC-DAD | 39 |

|        |                                                                     |                  |                  |                                 |    |          |    |
|--------|---------------------------------------------------------------------|------------------|------------------|---------------------------------|----|----------|----|
| Pomace | Cyanidin-3- <i>O</i> -glucoside                                     | OH               | H                | Glucoside                       | OH | HPLC-DAD | 46 |
|        | Delphinidin-3- <i>O</i> -glucoside                                  | OH               | OH               | Glucoside                       | OH | HPLC-DAD | 45 |
|        |                                                                     |                  |                  |                                 |    | HPLC-DAD | 46 |
|        | Malvidin                                                            | OCH <sub>3</sub> | OCH <sub>3</sub> | OH                              | OH | LC-MS    | 42 |
|        | Malvidin-3- <i>O</i> -(6"- <i>O</i> -acetyl)glucoside               | OCH <sub>3</sub> | OCH <sub>3</sub> | (acetyl)glucoside               | OH | LC-MS    | 42 |
|        | Malvidin-3- <i>O</i> -(6"- <i>O</i> -caffeoyl)glucoside             | OCH <sub>3</sub> | OCH <sub>3</sub> | (caffeoyl)glucoside             | OH | HPLC-MS  | 44 |
|        | Malvidin-3- <i>O</i> -(6"- <i>O</i> - <i>p</i> -coumaroyl)glucoside | OCH <sub>3</sub> | OCH <sub>3</sub> | ( <i>p</i> -coumaroyl)glucoside | OH | HPLC-MS  | 44 |
|        | Malvidin-3- <i>O</i> -glucoside                                     | OCH <sub>3</sub> | OCH <sub>3</sub> | Glucoside                       | OH | HPLC-MS  | 44 |
|        |                                                                     |                  |                  |                                 |    | LC-MS    | 42 |
|        |                                                                     |                  |                  |                                 |    | HPLC-DAD | 45 |
|        |                                                                     |                  |                  |                                 |    | HPLC-DAD | 46 |
|        | Peonidin-3- <i>O</i> -(6"- <i>O</i> -acetyl)glucoside               | OCH <sub>3</sub> | H                | Acetylglucoside                 | OH | HPLC-MS  | 44 |
|        | Peonidin-3- <i>O</i> -(6"- <i>O</i> - <i>p</i> -coumaroyl)glucoside | OCH <sub>3</sub> | H                | ( <i>p</i> -coumaroyl)glucoside | OH | HPLC-MS  | 44 |

|                                                                       |                  |    |                                 |    |          |    |
|-----------------------------------------------------------------------|------------------|----|---------------------------------|----|----------|----|
|                                                                       |                  |    |                                 |    | HPLC-DAD | 46 |
| Peonidin-3- <i>O</i> -glucoside                                       | OCH <sub>3</sub> | H  | Glucoside                       | OH | LC-MS    | 42 |
|                                                                       |                  |    |                                 |    | HPLC-DAD | 45 |
| Petunidin-3- <i>O</i> -(6''- <i>O</i> - <i>p</i> -coumaroyl)glucoside | OCH <sub>3</sub> | OH | ( <i>p</i> -coumaroyl)glucoside | OH | HPLC-MS  | 44 |
|                                                                       |                  |    |                                 |    | HPLC-MS  | 44 |
| Petunidin-3- <i>O</i> -glucoside                                      | OCH <sub>3</sub> | OH | Glucoside                       | OH | HPLC-DAD | 45 |
|                                                                       |                  |    |                                 |    | HPLC-DAD | 46 |
