# Supplementary figures and images for: The Greening of Anthocyanins: Eco-Friendly Techniques for Their Recovery from Agri-Food By-Products
Source: MDPI journal article supplement (doi:10.3390/antiox11112169), 2022-11-01

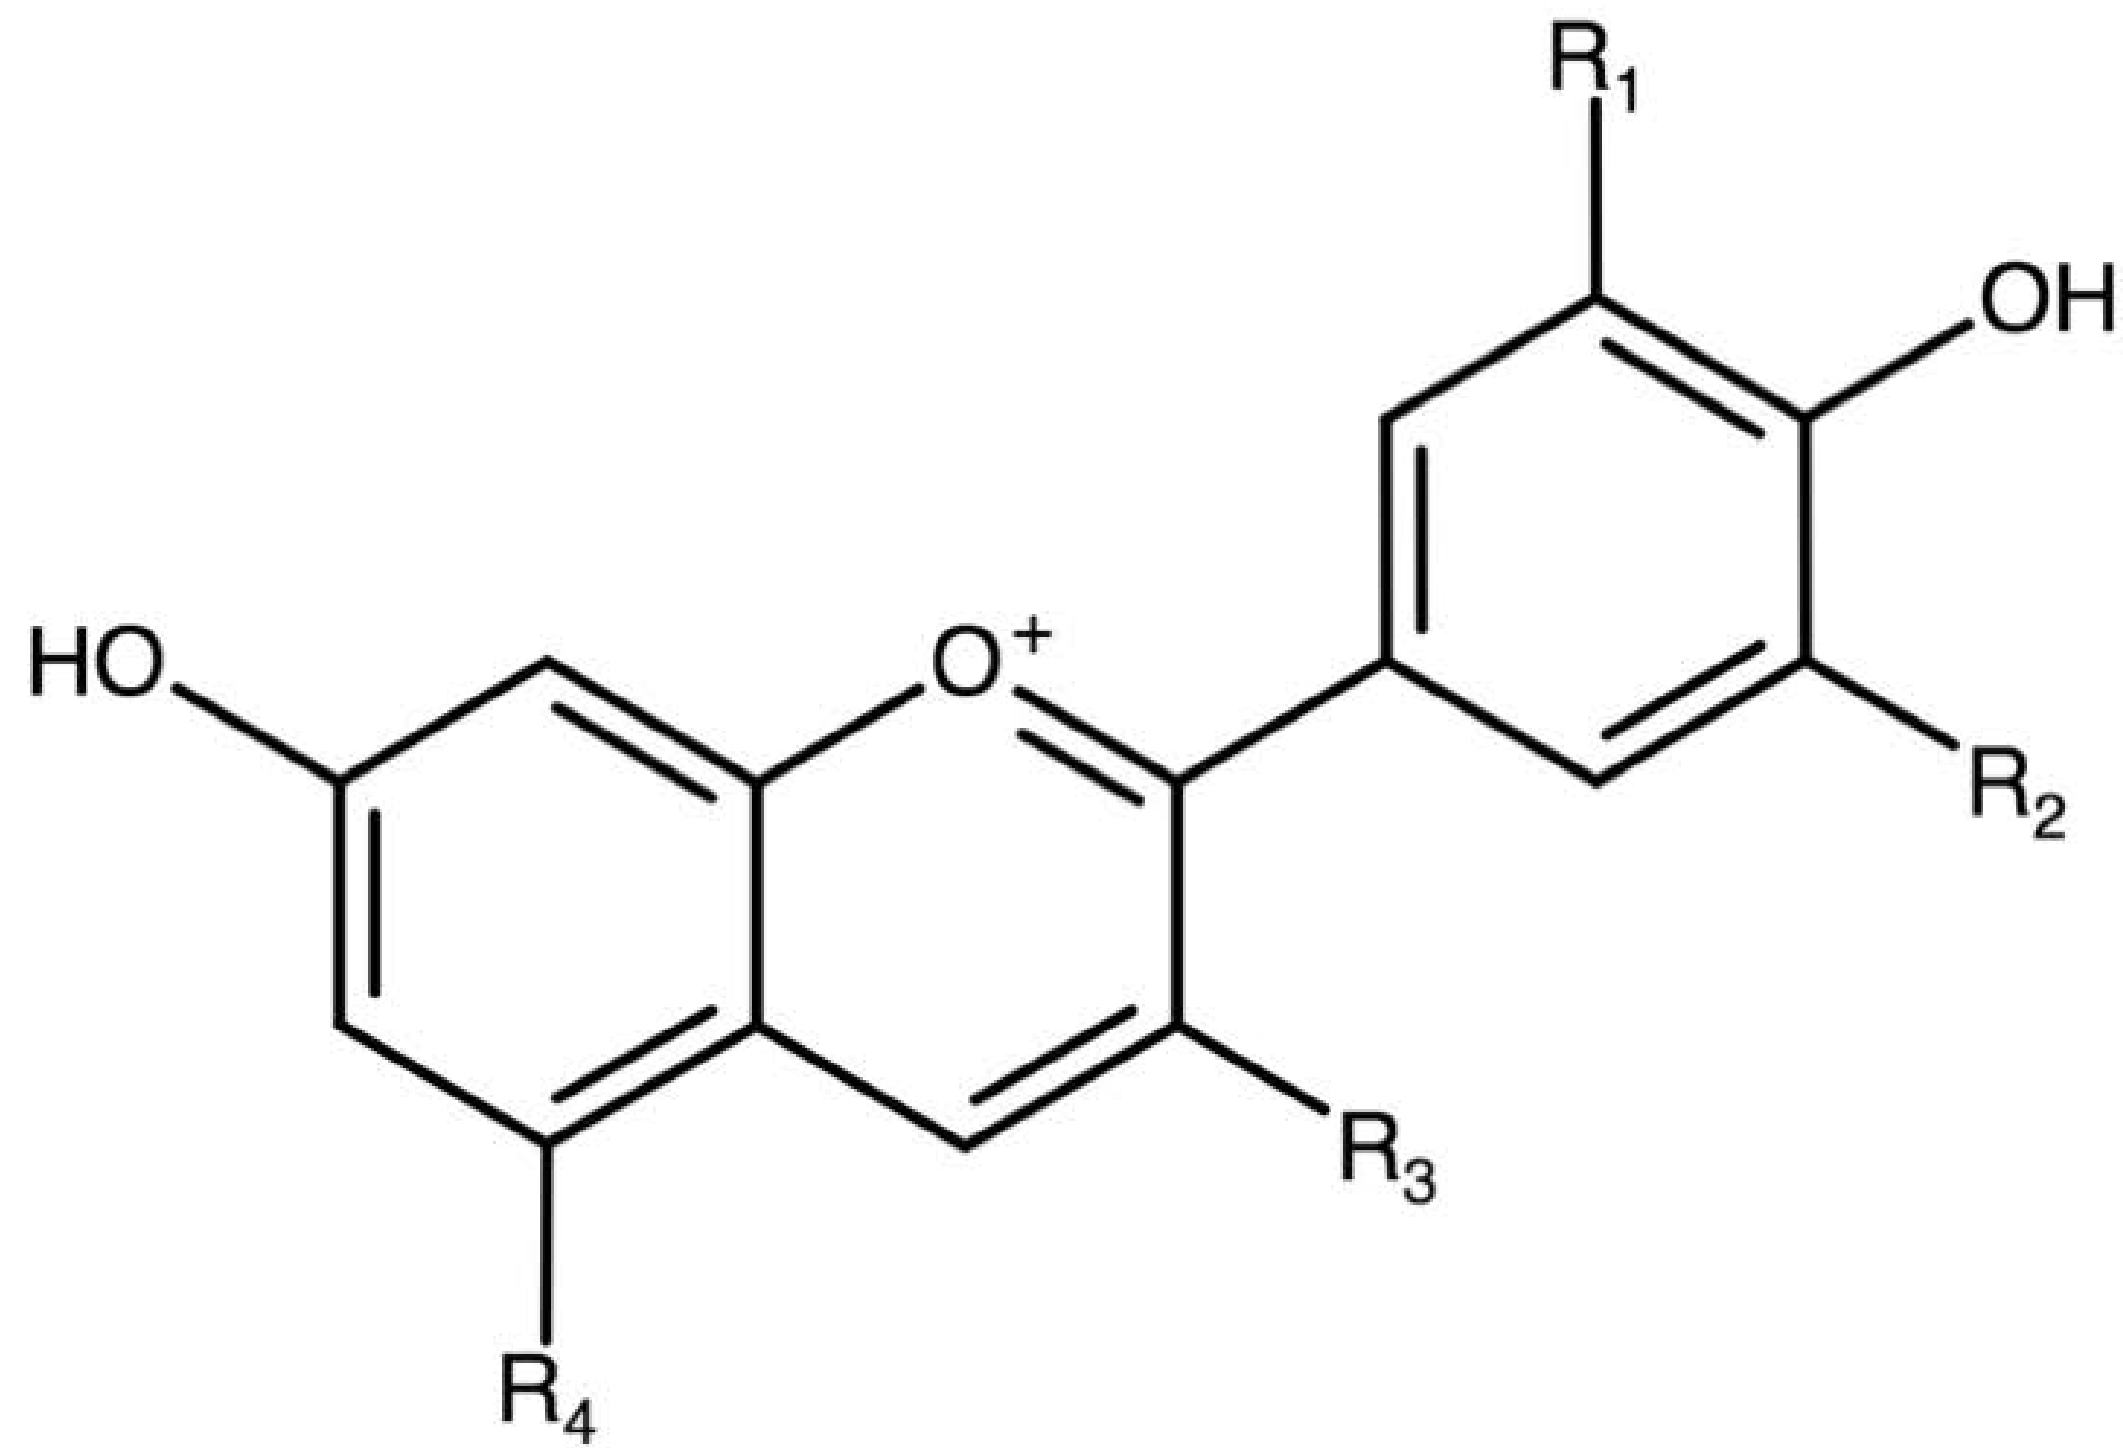

**Figure S1.** General anthocyanin structure.

Supplement: s1 [file s1]
